# Supplementary material for: Chemoresistance-Associated Silencing of miR-4454 Promotes Colorectal Cancer Aggression through the GNL3L and NF-κB Pathway
Source: MDPI journal article supplement (doi:10.3390/cancers12051231), 2020-05-14
Supplement: s1 [file s1]

## Supplementary Materials:

Thetchinamoorthy Kannathasan, Wei-Wen Kuo, Ming-Cheng Chen, Vijaya Padma Viswanadha, Chia-Yao Shen, Chuan-Chou Tu, Yu-Lan Yeh, Mahalakshmi Bharath, Marthandam Asokan Shibu and Chih-Yang Huang

**Table 1.** List of primers for qPCR.

| No. | ID Name                              | Sequences                             |
|-----|--------------------------------------|---------------------------------------|
| 1.  | hsa-miR-30c-1-3p                     | CTGGGAGAGGGTTGTTTACTCC                |
| 2.  | hsa-miR-4792                         | CGGTGAGCGCTCGCTGGC                    |
| 3.  | hsa-miR-6511b-5p                     | CTGCAGGCAGAAGTGGGGCTGACA              |
| 4.  | hsa-miR-4454                         | GGATCCGAGTCACGGCACCA                  |
| 5.  | hsa-miR-1914-3p                      | GGAGGGGTCCCGCACTGGGAGG                |
| 6.  | hsa-miR-5191                         | AGGATAGGAAGAATGAAGTGCT                |
| 7.  | Forward – GNL3L                      | ACTCTGCCCACCCATCTCA                   |
|     | Reverse – GNL3L                      | TTCAAGTGGGTCCGTGTCA                   |
| 8.  | Forward - Xho1- WT – GNL3L – Oligo   | <b>TCGAG</b> -AATCCCAGCATTTTGGGAGGCCG |
|     |                                      | AGGCAGGCGGATCACTTGAGGT                |
| 9.  | Reverse – Sal1 - WT – GNL3L – Oligo  | <b>TCGAC</b> -ACCTCAAGTGATCCGCCTG     |
|     |                                      | CCTCGGCCTCCCAAATGCTGGGATT             |
| 10. | Forward – Xho1 - Mut – GNL3L – Oligo | <b>TCGAG</b> -AATCCCAGCATTTTGGGAGGCCG |
|     |                                      | AGGCAGGAGTATCACTTGAGGT                |

**Table S2.** List of primers for cloning.

|                                                                                                                       |                                          |
|-----------------------------------------------------------------------------------------------------------------------|------------------------------------------|
| <b>pSBInducer, shRNA oligos (The mature siRNA/miRNA in the template oligos is underlined.</b>                         |                                          |
| miR30PCR <sup>XhoI</sup>                                                                                              | CAGAAGGCTCGAGAAGGTATATTGCTGTTGACAGTGAGCG |
| miR30PCRE <sup>coRI</sup>                                                                                             | CTAAAGTAGCCCCTTGAATTCCGAGGCAGTAGGCA      |
| <b>miR-4454</b>                                                                                                       |                                          |
| TGCTGTTGACAGTGAGCGCGAGGGGGAAAGTTCTATAGTCTAGTGAAGCCACAGATGTAG <u>GGATCCGA</u><br><u>GTCACGGCACCATGCCTACTGCCTCGGA</u>   |                                          |
| <b>miR-4792</b>                                                                                                       |                                          |
| TGCTGTTGACAGTGAGCGCGAGGGGGAAAGTTCTATAGTCTAGTGAAGCCACAGATGTAC <u>CGGTGAGC</u><br><u>GCTCGCTGGCTGCCTACTGCCTCGGA</u>     |                                          |
| <b>siRNA_Scramble:</b>                                                                                                |                                          |
| TGCTGTTGACAGTGAGCGCAGTGTACAGGGCTAGATACGACTAGTGAAGCCACAGATGTAG <u>TCGTATCT</u><br><u>AGCCCTGACACTATGCCTACTGCCTCGGA</u> |                                          |

**Table S3.** Antibody list.

| Antibody Name         | Provider       | Cat.log Number |
|-----------------------|----------------|----------------|
| GNL3L                 | Abcam          | ab94862        |
| p53 (1C12)            | Cell Signaling | #2524          |
| p-p53                 | Cell Signaling | #9284          |
| MDM2 (SMP14)          | Santa Cruz     | sc-965         |
| NFkB                  | Santa Cruz     | sc-109         |
| pNFkB (Ser536) (93H1) | Cell Signaling | #3033L         |
| CD133                 | Proteintech    | 184700         |
| Cyclin D              | Santa Cruz     | sc-246         |
| Twist (2C1a)          | Santa Cruz     | sc-81417       |
| Snai 1 (T-18)         | Santa Cruz     | sc-10433       |
| Beta-Catenin          | Santa Cruz     | sc-1496        |
| IKKalpha/beta         | Santa Cruz     | sc-7607        |
| p27 (F-8)             | Santa Cruz     | sc1641         |
| LC3B                  | Cell Signaling | #2775          |
| EGFR                  | Cell Signaling | #2232          |
| p-EGFR                | Abcam          | ab5644         |
| Beta-Actin            | Santa Cruz     | sc-47778       |

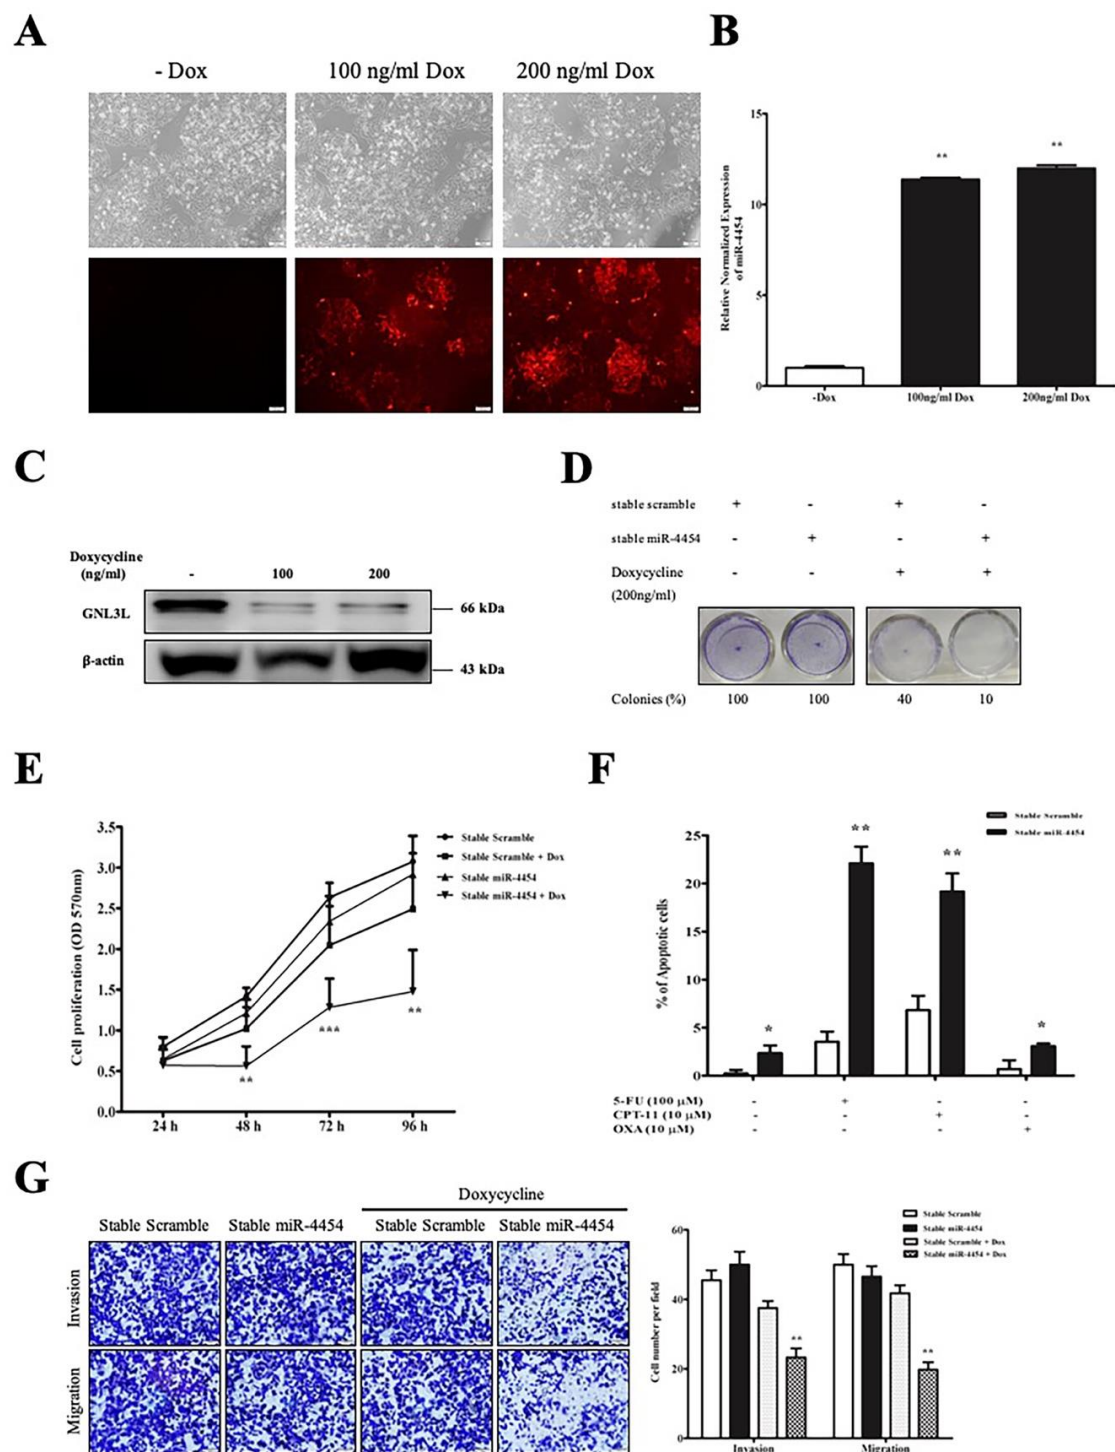

# H

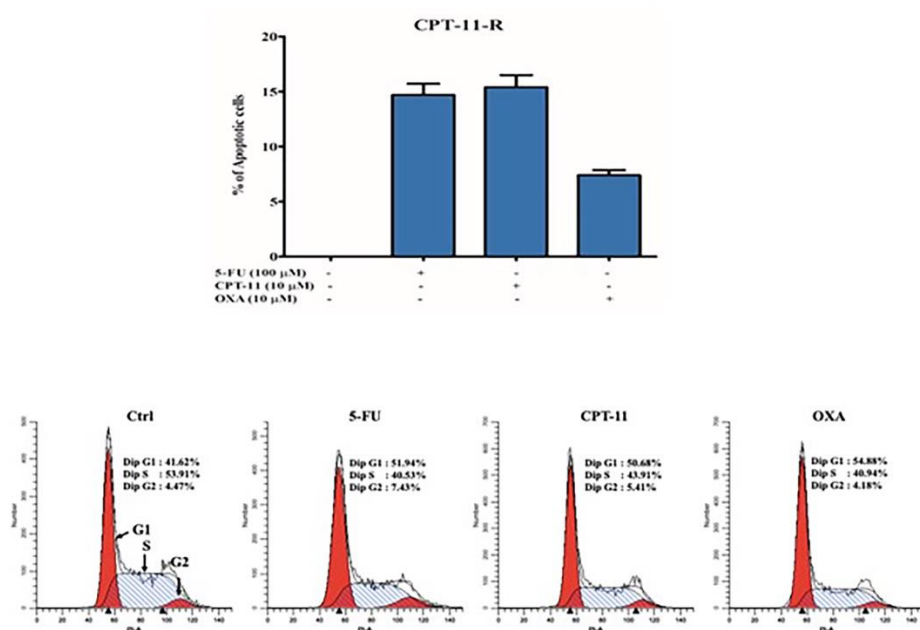

**Figure S1.** Figure depicting single clone selection. (A) Doxycycline induction and expression of RFP at different concentrations at 72 h. (B) Functional proof that Dox induction leads to overexpression miR-4454 in the CPT-11-R cells. (C) Functional proof that Dox-induced miR-4454 overexpression in cells with reduced GNL3L protein expression levels. (D) Colony formation assay. (E) Cell proliferation assay. (F) Analysis of apoptosis after first-line treatment in CPT-11-R scramble or miR-4454-overexpressing cells. (G) Invasion/migration assay (right and left). (H) CPT-11-R cross-resistance to other anti-cancer drugs (5-FU, Oxaliplatin) through Annexin V apoptosis and cell cycle state.
